# Supplementary material for: Genomic and Post-Translational Modification Analysis of Leucine-Rich-Repeat Receptor-Like Kinases in Brassica rapa
Source: PLoS One. 2015 Nov 20;10(11):e0142255. doi: 10.1371/journal.pone.0142255 (PMC4654520; doi:10.1371/journal.pone.0142255)
Supplement: S3 Table — (A) Paralogical copies of B. rapa LRR-RLK genes and (B) Tandem and Segmental duplications of B. rapa LRR-RLK genes. (XLSX) [file pone.0142255.s009.xlsx]

## Sheet: A) paralogical copies
S3 Table. Details of the LRR-RLK gene duplications identified in the genome of B. rapa. (A) Paralogical copies of B. rapa LRR-RLK genes and (B) Tandem and Segmental duplications of B. rapa LRR-RLK genes
Paralogical copies of B. rapa LRR-RLK genes
A01	A02	A03	A04	A05	A06	A07	A08	A09	A10	Scaffolds
BrLRR-RLK1	-	-	-	-	BrLRR-RLK189	-	BrLRR-RLK237	-	-	-
BrLRR-RLK2	-	-	-	-	-	-	-	-	-	-
BrLRR-RLK3	-	-	-	-	-	-	-	-	-	-
BrLRR-RLK4	-	-	-	-	-	-	-	-	-	BrLRR-RLK300
BrLRR-RLK5	-	BrLRR-RLK103	-	-	-	-	BrLRR-RLK236	-	-	-
BrLRR-RLK6	-	-	-	-	-	-	-	-	-	-
BrLRR-RLK7	-	BrLRR-RLK102	-	-	-	-	-	-	-	-
BrLRR-RLK8	-	-	-	-	-	-	-	-	-	-
BrLRR-RLK9	-	-	-	-	-	-	-	-	-	-
BrLRR-RLK10	-	-	-	-	-	-	-	-	-	-
BrLRR-RLK11	-	-	-	-	-	-	-	-	-	-
BrLRR-RLK12	-	-	-	-	-	-	-	-	-	-
BrLRR-RLK13	-	-	-	-	-	-	-	-	-	-
BrLRR-RLK14	-	BrLRR-RLK99	-	-	-	-	BrLRR-RLK233	-	-	-
BrLRR-RLK15	-	BrLRR-RLK100	-	-	-	-	-	-	-	-
BrLRR-RLK16	-	-	-	-	-	-	BrLRR-RLK235	-	-	-
BrLRR-RLK17	-	-	-	-	-	-	-	-	-	-
BrLRR-RLK18	-	-	-	-	-	-	-	-	-	-
BrLRR-RLK19	-	-	-	-	-	-	-	-	-	-
BrLRR-RLK20	-	-	-	-	-	-	-	-	-	-
BrLRR-RLK21	-	-	-	-	-	-	-	-	-	-
BrLRR-RLK22	-	-	-	-	-	-	-	-	-	-
BrLRR-RLK23	-	-	-	-	-	-	-	-	-	-
BrLRR-RLK24	-	-	-	-	-	-	-	-	-	-
BrLRR-RLK25	-	-	-	-	-	-	-	-	-	-
BrLRR-RLK26	-	-	-	-	-	BrLRR-RLK192	-	-	-	-
BrLRR-RLK27	-	-	-	-	-	-	-	-	-	-
BrLRR-RLK28	-	BrLRR-RLK92	-	-	-	-	-	-	-	-
BrLRR-RLK29	-	-	-	-	-	-	-	-	-	-
BrLRR-RLK30	-	-	-	BrLRR-RLK131	BrLRR-RLK165	-	-	BrLRR-RLK251	-	-
BrLRR-RLK31	-	-	-	BrLRR-RLK144	-	-	-	-	-	-
BrLRR-RLK32	-	-	-	-	-	-	-	-	-	-
BrLRR-RLK33	-	-	-	-	-	-	-	-	-	BrLRR-RLK298
BrLRR-RLK34	-	BrLRR-RLK90, BrLRR-RLK91	-	BrLRR-RLK145, BrLRR-RLK146, BrLRR-RLK147	-	-	-	-	-	-
BrLRR-RLK35	-	-	-	BrLRR-RLK148	-	-	-	-	-	-
BrLRR-RLK36	-	-	-	-	-	-	-	-	-	-
BrLRR-RLK37	-	-	-	-	-	-	-	-	-	-
BrLRR-RLK38	-	BrLRR-RLK88	-	-	-	-	-	-	-	-
BrLRR-RLK39	-	-	-	-	-	-	-	-	-	-
BrLRR-RLK40	-	-	-	-	-	-	-	-	-	-
-	BrLRR-RLK41	-	-	-	-	-	-	-	-	-
-	BrLRR-RLK42	-	-	-	-	-	-	-	-	-
-	BrLRR-RLK43	-	-	-	-	-	-	-	-	-
-	BrLRR-RLK44	-	-	BrLRR-RLK151	-	-	-	-	BrLRR-RLK284	-
-	BrLRR-RLK45	-	-	-	-	-	-	-	BrLRR-RLK281	-
-	BrLRR-RLK46	-	-	-	-	-	-	-	-	-
-	BrLRR-RLK47	-	-	-	-	-	-	-	-	-
-	BrLRR-RLK48	-	-	-	-	-	-	-	-	-
-	BrLRR-RLK49	-	-	-	-	-	-	-	-	-
-	BrLRR-RLK50	-	-	-	-	-	-	-	-	-
-	BrLRR-RLK51	-	-	-	-	-	-	-	BrLRR-RLK278	-
-	BrLRR-RLK52	-	-	-	-	-	-	-	-	-
-	BrLRR-RLK53	-	-	-	-	-	-	-	-	-
-	BrLRR-RLK54	-	-	-	-	-	-	-	-	-
-	BrLRR-RLK55	-	-	-	-	-	-	-	-	-
-	BrLRR-RLK56	-	-	-	-	-	-	-	-	-
-	BrLRR-RLK57	-	-	-	-	BrLRR-RLK219	-	-	-	-
-	BrLRR-RLK58	-	-	-	-	BrLRR-RLK209	-	-	-	-
-	BrLRR-RLK59	-	-	-	-	-	-	-	-	-
-	BrLRR-RLK60	-	-	-	-	-	-	-	-	-
-	BrLRR-RLK61	-	-	-	BrLRR-RLK184	-	-	-	-	-
-	BrLRR-RLK62	-	-	-	-	-	-	BrLRR-RLK255	-	-
-	BrLRR-RLK63	-	-	-	-	-	-	-	-	-
-	BrLRR-RLK64	-	-	-	-	-	-	-	-	-
-	BrLRR-RLK65	-	-	-	-	-	-	-	-	-
-	BrLRR-RLK66	-	-	-	-	-	-	-	-	-
-	BrLRR-RLK67	-	-	-	BrLRR-RLK171, BrLRR-RLK172	-	-	-	-	-
-	BrLRR-RLK68	BrLRR-RLK89	-	-	-	-	-	-	-	-
-	-	BrLRR-RLK69	-	-	-	-	-	-	-	-
-	-	BrLRR-RLK70	-	-	-	-	-	-	-	-
-	-	BrLRR-RLK71	-	-	-	-	-	-	BrLRR-RLK289	-
-	-	BrLRR-RLK72	-	-	-	-	-	-	BrLRR-RLK287	-
-	-	BrLRR-RLK73	-	-	-	-	-	-	BrLRR-RLK286	-
-	-	BrLRR-RLK74	-	-	-	-	-	-	BrLRR-RLK285	-
-	-	BrLRR-RLK75	-	-	-	-	-	-	BrLRR-RLK282	-
-	-	BrLRR-RLK76	BrLRR-RLK114, BrLRR-RLK115	BrLRR-RLK132, BrLRR-RLK143	BrLRR-RLK163	-	-	BrLRR-RLK262, BrLRR-RLK254, BrLRR-RLK266	BrLRR-RLK277	-
-	-	BrLRR-RLK77	-	-	-	-	-	-	-	-
-	-	BrLRR-RLK78	-	-	-	-	-	-	-	-
-	-	BrLRR-RLK79	-	-	-	-	-	-	-	-
-	-	BrLRR-RLK80	BrLRR-RLK114, BrLRR-RLK115	BrLRR-RLK132, BrLRR-RLK143	BrLRR-RLK163	-	-	BrLRR-RLK262, BrLRR-RLK254, BrLRR-RLK266	BrLRR-RLK277	-
-	-	BrLRR-RLK81	BrLRR-RLK117 BrLRR-RLK118	-	-	-	-	-	-	-
-	-	BrLRR-RLK82	BrLRR-RLK120	BrLRR-RLK127	-	-	-	-	-	-
-	-	BrLRR-RLK83	-	-	-	-	-	-	-	-
-	-	BrLRR-RLK84	-	BrLRR-RLK126	-	-	-	-	-	-
-	-	BrLRR-RLK85	-	-	-	-	-	-	-	-
-	-	BrLRR-RLK86	-	-	-	-	-	BrLRR-RLK249 BrLRR-RLK250	BrLRR-RLK272	-
-	-	BrLRR-RLK87	-	-	-	-	-	-	-	-
BrLRR-RLK38	-	BrLRR-RLK88	-	-	-	-	-	-	-	-
-	BrLRR-RLK68	BrLRR-RLK89	-	-	-	-	-	-	-	-
BrLRR-RLK34	-	BrLRR-RLK90	-	BrLRR-RLK145 BrLRR-RLK146 BrLRR-RLK147	-	-	-	-	-	-
BrLRR-RLK34	-	BrLRR-RLK91	-	BrLRR-RLK145 BrLRR-RLK146 BrLRR-RLK147	-	-	-	-	-	-
BrLRR-RLK28	-	BrLRR-RLK92	-	-	-	-	-	-	-	-
-	-	BrLRR-RLK93	-	-	-	-	-	-	-	-
-	-	BrLRR-RLK94	-	-	-	-	-	-	-	-
-	-	BrLRR-RLK95	BrLRR-RLK109 BrLRR-RLK110	-	-	-	-	-	-	BrLRR-RLK294
-	-	BrLRR-RLK96	-	-	-	-	-	-	BrLRR-RLK283	-
-	-	BrLRR-RLK97	-	-	-	-	-	-	-	-
-	-	BrLRR-RLK98	-	-	-	-	-	-	-	-
BrLRR-RLK14	-	BrLRR-RLK99	-	-	-	-	BrLRR-RLK233	-	-	-
BrLRR-RLK15	-	BrLRR-RLK100	-	-	-	-	-	-	-	-
-	-	BrLRR-RLK101	-	-	-	-	-	-	-	-
BrLRR-RLK7	-	BrLRR-RLK102	-	-	-	-	-	-	-	-
BrLRR-RLK5	-	BrLRR-RLK103	-	-	-	-	BrLRR-RLK236	-	-	-
-	-	BrLRR-RLK104	-	-	-	-	-	-	-	-
-	-	BrLRR-RLK105	-	-	-	-	-	-	-	-
-	-	-	BrLRR-RLK106	-	-	BrLRR-RLK206	-	-	-	-
-	-	-	BrLRR-RLK107	-	-	-	-	-	-	-
-	-	-	BrLRR-RLK108	-	-	-	-	-	-	-
-	-	BrLRR-RLK95	BrLRR-RLK109	-	-	-	-	-	-	BrLRR-RLK294
-	-	BrLRR-RLK95	BrLRR-RLK110	-	-	-	-	-	-	BrLRR-RLK294
-	-	-	BrLRR-RLK111	-	-	-	-	-	-	-
-	-	-	BrLRR-RLK112	-	-	-	-	-	-	-
-	-	-	BrLRR-RLK113	-	-	BrLRR-RLK204	-	-	-	-
-	-	BrLRR-RLK76 BrLRR-RLK80	BrLRR-RLK114	BrLRR-RLK132 BrLRR-RLK143	BrLRR-RLK163	-	-	BrLRR-RLK262 BrLRR-RLK254 BrLRR-RLK266	BrLRR-RLK277	-
-	-	BrLRR-RLK76 BrLRR-RLK80	BrLRR-RLK115	BrLRR-RLK132 BrLRR-RLK143	BrLRR-RLK163	-	-	BrLRR-RLK262 BrLRR-RLK254 BrLRR-RLK266	BrLRR-RLK277	-
-	-	-	BrLRR-RLK116	-	-	-	-	-	-	-
-	-	BrLRR-RLK81	BrLRR-RLK117	-	-	-	-	-	-	-
-	-	BrLRR-RLK81	BrLRR-RLK118	-	-	-	-	-	-	-
-	-	-	BrLRR-RLK119	-	-	-	-	-	-	-
-	-	BrLRR-RLK82	BrLRR-RLK120	BrLRR-RLK127	-	-	-	-	-	-
-	-	-	BrLRR-RLK121	BrLRR-RLK124	-	-	-	-	-	-
-	-	-	BrLRR-RLK122	-	-	-	-	-	-	-
-	-	-	BrLRR-RLK123	BrLRR-RLK125	-	-	-	-	-	-
-	-	-	BrLRR-RLK121	BrLRR-RLK124	-	-	-	-	-	-
-	-	-	BrLRR-RLK123	BrLRR-RLK125	-	-	-	-	-	-
-	-	BrLRR-RLK84	-	BrLRR-RLK126	-	-	-	-	-	-
-	-	BrLRR-RLK82	BrLRR-RLK120	BrLRR-RLK127	-	-	-	-	-	-
-	-	-	-	BrLRR-RLK128	-	-	-	-	-	-
-	-	-	-	BrLRR-RLK129	-	-	-	-	-	-
-	-	-	-	BrLRR-RLK130	BrLRR-RLK156	-	-	BrLRR-RLK269	-	-
BrLRR-RLK30	-	-	-	BrLRR-RLK131	BrLRR-RLK165	-	-	BrLRR-RLK251	-	-
-	-	BrLRR-RLK76 BrLRR-RLK80	BrLRR-RLK114 BrLRR-RLK115	BrLRR-RLK132	BrLRR-RLK163	-	-	BrLRR-RLK262 BrLRR-RLK254 BrLRR-RLK266	BrLRR-RLK277	-
-	-	-	-	BrLRR-RLK133	-	-	-	-	-	-
-	-	-	-	BrLRR-RLK134	BrLRR-RLK153	-	-	-	-	-
-	-	-	-	BrLRR-RLK135	-	-	-	-	-	-
-	-	-	-	BrLRR-RLK136	-	-	-	-	-	-
-	-	-	-	BrLRR-RLK137	-	-	-	-	-	-
-	-	-	-	BrLRR-RLK138	-	-	-	-	-	-
-	-	-	-	BrLRR-RLK139	-	-	BrLRR-RLK228	-	-	-
-	-	-	-	BrLRR-RLK140	-	-	-	-	-	-
-	-	-	-	BrLRR-RLK141	-	-	-	-	-	-
-	-	-	-	BrLRR-RLK142	-	-	-	-	-	-
-	-	BrLRR-RLK76 BrLRR-RLK80	BrLRR-RLK114 BrLRR-RLK115	BrLRR-RLK143	BrLRR-RLK163	-	0	BrLRR-RLK262 BrLRR-RLK254 BrLRR-RLK266	BrLRR-RLK277	-
BrLRR-RLK31	-	-	-	BrLRR-RLK144	-	-	-	-	-	-
BrLRR-RLK34	-	BrLRR-RLK90 BrLRR-RLK91	-	BrLRR-RLK145	-	-	-	-	-	-
BrLRR-RLK34	-	BrLRR-RLK90 BrLRR-RLK91	-	BrLRR-RLK146	-	-	-	-	-	-
BrLRR-RLK34	-	BrLRR-RLK90 BrLRR-RLK91	-	BrLRR-RLK147	-	-	-	-	-	-
BrLRR-RLK35	-	-	-	BrLRR-RLK148	-	-	-	-	-	-
-	-	-	-	BrLRR-RLK149	-	-	-	-	-	-
-	-	-	-	BrLRR-RLK150	-	-	-	-	-	BrLRR-RLK299
-	BrLRR-RLK44	-	-	BrLRR-RLK151	-	-	-	-	BrLRR-RLK284	-
-	-	-	-	-	BrLRR-RLK152	-	BrLRR-RLK227	-	-	-
-	-	-	-	BrLRR-RLK134	BrLRR-RLK153	-	-	-	-	-
-	-	-	-	-	BrLRR-RLK154	-	-	-	-	-
-	-	-	-	-	BrLRR-RLK155	-	-	-	-	-
-	-	-	-	BrLRR-RLK130	BrLRR-RLK156	-	-	BrLRR-RLK269	-	-
-	-	-	-	-	BrLRR-RLK157	-	-	-	-	-
-	-	-	-	-	BrLRR-RLK158	-	-	-	-	-
-	-	-	-	-	BrLRR-RLK159	-	-	-	-	-
-	-	-	-	-	BrLRR-RLK160	-	-	-	-	-
-	-	-	-	-	BrLRR-RLK161	-	-	-	-	-
-	-	-	-	-	BrLRR-RLK162	-	-	-	-	-
-	-	BrLRR-RLK76 BrLRR-RLK80	BrLRR-RLK114 BrLRR-RLK115	BrLRR-RLK132 BLK143	BrLRR-RLK163	-	-	BrLRR-RLK262 BrLRR-RLK254 BrLRR-RLK266	BrLRR-RLK277	-
-	-	-	-	-	BrLRR-RLK164	-	-	-	-	-
BrLRR-RLK30	-	-	-	BrLRR-RLK131	BrLRR-RLK165	-	-	BrLRR-RLK251	-	-
-	-	-	-	-	BrLRR-RLK166	-	-	-	-	-
-	-	-	-	-	BrLRR-RLK167	-	-	-	-	-
-	-	-	-	-	BrLRR-RLK168	-	-	-	-	-
-	-	-	-	-	BrLRR-RLK169	-	-	-	-	-
-	-	-	-	-	BrLRR-RLK170	-	-	-	-	-
-	BrLRR-RLK67	-	-	-	BrLRR-RLK171	-	-	-	-	-
-	BrLRR-RLK67	-	-	-	BrLRR-RLK172	-	-	-	-	-
-	-	-	-	-	BrLRR-RLK173	-	-	-	-	-
-	-	-	-	-	BrLRR-RLK174	-	-	BrLRR-RLK244	-	-
-	-	-	-	-	BrLRR-RLK175	-	-	-	-	-
-	-	-	-	-	BrLRR-RLK176	-	-	-	-	-
-	-	-	-	-	BrLRR-RLK177	-	-	BrLRR-RLK242	-	-
-	-	-	-	-	BrLRR-RLK178	-	-	-	-	-
-	-	-	-	-	BrLRR-RLK179	-	-	-	-	-
-	-	-	-	-	BrLRR-RLK180	-	-	-	-	-
	-	-	-		BrLRR-RLK181	-	-	-	-	-
-	-	-	-	-	BrLRR-RLK182	-	-	BrLRR-RLK258	-	-
-	-	-	-	-	BrLRR-RLK183	-	-	-	-	-
-	BrLRR-RLK61	-	-	-	BrLRR-RLK184	-	-	-	-	-
-	-	-	-	-	BrLRR-RLK185	-	-	-	-	-
-	-	-	-	-	BrLRR-RLK186	-	-	-	-	-
-	-	-	-	-	BrLRR-RLK187	-	-	-	-	BrLRR-RLK301
-	-	-	-	-	BrLRR-RLK188	-	BrLRR-RLK224 BrLRR-RLK225	-	-	BrLRR-RLK297
BrLRR-RLK1	-	-	-	-	BrLRR-RLK189	-	BrLRR-RLK237	-	-	-
-	-	-	-	-	BrLRR-RLK190	-	-	-	-	-
-	-	-	-	-	-	BrLRR-RLK191	-	-	-	-
BrLRR-RLK26	-	-	-	-	-	BrLRR-RLK192	-	-	-	-
-	-	-	-	-	-	BrLRR-RLK193	-	-	-	-
-	-	-	-	-	-	BrLRR-RLK194	-	-	-	-
-	-	-	-	-	-	BrLRR-RLK195	BrLRR-RLK238	BrLRR-RLK256 BrLRR-RLK257	-	-
-	-	-	-	-	-	BrLRR-RLK196	BrLRR-RLK238	BrLRR-RLK256 BrLRR-RLK257	-	-
-	-	-	-	-	-	BrLRR-RLK197	BrLRR-RLK238	BrLRR-RLK256 BrLRR-RLK257	-	-
-	-	-	-	-	-	BrLRR-RLK198	BrLRR-RLK239	BrLRR-RLK252	-	-
-	-	-	-	-	-	BrLRR-RLK199	-	-	-	-
-	-	-	-	-	-	BrLRR-RLK200	-	-	-	-
-	-	-	-	-	-	BrLRR-RLK201	-	-	-	-
-	-	-	-	-	-	BrLRR-RLK202	-	-	-	-
-	-	-	-	-	-	BrLRR-RLK203	-	-	-	-
-	-	-	BrLRR-RLK113	-	-	BrLRR-RLK204	-	-	-	-
-	-	-	-	-	-	BrLRR-RLK205	-	-	-	-
-	-	-	BrLRR-RLK106	-	-	BrLRR-RLK206	-	-	-	-
-	-	-	-	-	-	BrLRR-RLK207	-	-	-	-
-	-	-	-	-	-	BrLRR-RLK208	-	-	-	-
-	BrLRR-RLK58	-	-	-	-	BrLRR-RLK209	-	-	-	-
-	-	-	-	-	-	BrLRR-RLK210	-	-	-	-
-	-	-	-	-	-	BrLRR-RLK211	-	-	-	-
-	-	-	-	-	-	BrLRR-RLK212	-	-	-	-
-	-	-	-	-	-	BrLRR-RLK213	-	-	-	-
-	-	-	-	-	-	BrLRR-RLK214	-	-	-	-
-	-	-	-	-	-	BrLRR-RLK215	-	-	-	-
-	-	-	-	-	-	BrLRR-RLK216	-	-	-	-
-	-	-	-	-	-	BrLRR-RLK217	-	-	-	-
-	-	-	-	-	-	BrLRR-RLK218	-	-	-	-
-	BrLRR-RLK57	-	-	-	-	BrLRR-RLK219	-	-	-	-
-	-	-	-	-	-	BrLRR-RLK220	-	-	-	-
-	-	-	-	-	-	BrLRR-RLK221	-	-	-	-
-	-	-	-	-	-	BrLRR-RLK222	-	-	-	-
-	-	-	-	-	-	BrLRR-RLK223	-	-	-	-
-	-	-	-	-	BrLRR-RLK188	-	BrLRR-RLK224	-	-	BrLRR-RLK297
-	-	-	-	-	BrLRR-RLK188	-	BrLRR-RLK225	-	-	BrLRR-RLK297
-	-	-	-	-	-	-	BrLRR-RLK226	-	-	-
-	-	-	-	-	BrLRR-RLK152	-	BrLRR-RLK227	-	-	-
-	-	-	-	BrLRR-RLK139	-	-	BrLRR-RLK228	-	-	-
-	-	-	-	-	-	-	BrLRR-RLK229	-	-	-
-	-	-	-	-	-	-	BrLRR-RLK230	-	-	-
-	-	-	-	-	-	-	BrLRR-RLK231	-	-	-
-	-	-	-	-	-	-	BrLRR-RLK232	-	-	-
BrLRR-RLK14	-	BrLRR-RLK99	-	-	-	-	BrLRR-RLK233	-	-	-
-	-	-	-	-	-	-	BrLRR-RLK234	-	-	-
BrLRR-RLK16	-	-	-	-	-	-	BrLRR-RLK235	-	-	-
BrLRR-RLK5	-	BrLRR-RLK103	-	-	-	-	BrLRR-RLK236	-	-	-
BrLRR-RLK1	-	-	-	-	BrLRR-RLK189	-	BrLRR-RLK237	-	-	-
-	-	-	-	-	-	BrLRR-RLK195 BrLRR-RLK196 BrLRR-RLK197	BrLRR-RLK238	BrLRR-RLK256 BrLRR-RLK257	-	-
-	-	-	-	-	-	BrLRR-RLK198	BrLRR-RLK239	BrLRR-RLK252	-	-
-	-	-	-	-	-	-	BrLRR-RLK240	-	-	-
-	-	-	-	-	-	-	BrLRR-RLK241	-	BrLRR-RLK275	-
-	-	-	-	-	BrLRR-RLK177	-	-	BrLRR-RLK242	-	-
-	-	-	-	-	-	-	-	BrLRR-RLK243	-	-
-	-	-	-	-	BrLRR-RLK174	-	-	BrLRR-RLK244	-	-
-	-	-	-	-	-	-	-	BrLRR-RLK245	-	-
-	-	-	-	-	-	-	-	BrLRR-RLK246	-	-
-	-	-	-	-	-	-	-	BrLRR-RLK247	-	-
-	-	-	-	-	-	-	-	BrLRR-RLK248	-	-
-	-	BrLRR-RLK86	-	-	-	-	-	BrLRR-RLK249	BrLRR-RLK272	-
-	-	BrLRR-RLK86	-	-	-	-	-	BrLRR-RLK250	BrLRR-RLK272	-
BrLRR-RLK30	-	-	-	BrLRR-RLK131	BrLRR-RLK166	-	-	BrLRR-RLK251	-	-
-	-	-	-	-	-	BrLRR-RLK198	BrLRR-RLK239	BrLRR-RLK252	-	-
-	-	-	-	-	-	-	-	BrLRR-RLK253	-	-
-	-	BrLRR-RLK76 BrLRR-RLK80	BrLRR-RLK114 BrLRR-RLK115	BrLRR-RLK132 BLK143	BrLRR-RLK163	-	-	BrLRR-RLK254	BrLRR-RLK277	-
-	BrRL62	-	-	-	-	-	-	BrLRR-RLK255	-	-
-	-	-	-	-	-	BrLRR-RLK195 BrLRR-RLK196 BrLRR-RLK197	BrLRR-RLK238	BrLRR-RLK256	-	-
-	-	-	-	-	-	BrLRR-RLK195 BrLRR-RLK196 BrLRR-RLK197	BrLRR-RLK238	BrLRR-RLK257	-	-
-	-	-	-	-	BrLRR-RLK182	-	-	BrLRR-RLK258	-	-
-	-	-	-	-	-	-	-	BrLRR-RLK259	-	-
-	-	-	-	-	-	-	-	BrLRR-RLK260	-	-
-	-	-	-	-	-	-	-	BrLRR-RLK261	-	-
-	-	BrLRR-RLK76 BrLRR-RLK80	BrLRR-RLK114 BrLRR-RLK115	BrLRR-RLK132 BLK143	BrLRR-RLK163	-	-	BrLRR-RLK262	BrLRR-RLK277	-
-	-	-	-	-	-	-	-	BrLRR-RLK263	-	-
-	-	-	-	-	-	-	-	BrLRR-RLK264	-	-
-	-	-	-	-	-	-	-	BrLRR-RLK265	-	-
-	-	BrLRR-RLK76 BrLRR-RLK80	BrLRR-RLK114 BrLRR-RLK115	BrLRR-RLK132 BLK143	BrLRR-RLK163	-	-	BrLRR-RLK266	BrLRR-RLK277	-
-	-	-	-	-	-	-	-	BrLRR-RLK267	-	-
-	-	-	-	-	-	-	-	BrLRR-RLK268	-	-
-	-	-	-	BrLRR-RLK130	BrLRR-RLK156	-	-	BrLRR-RLK269	-	-
-	-	-	-	-	-	-	-	BrLRR-RLK270	-	-
-	-	-	-	-	-	-	-	BrLRR-RLK271	BrLRR-RLK276	-
-	-	BrLRR-RLK86	-	-	-	-	-	BrLRR-RLK249 BrLRR-RLK250	BrLRR-RLK272	-
-	-	-	-	-	-	-	-	-	BrLRR-RLK273	-
-	-	-	-	-	-	-	-	-	BrLRR-RLK274	-
-	-	-	-	-	-	-	BrLRR-RLK241	-	BrLRR-RLK275	-
-	-	-	-	-	-	-	-	BrLRR-RLK271	BrLRR-RLK276	-
-	-	BrLRR-RLK76 BrLRR-RLK80	BrLRR-RLK114 BrLRR-RLK115	BrLRR-RLK132 BLK143	BrLRR-RLK163	-	-	BrLRR-RLK262 BrLRR-RLK254 BrLRR-RLK266	BrLRR-RLK277	-
-	BrLRR-RLK51	-	-	-	-	-	-	-	BrLRR-RLK278	-
-	-	-	-	-	-	-	-	-	BrLRR-RLK279	-
-	BrLRR-RLK46	-	-	-	-	-	-	-	BrLRR-RLK280	-
-	BrLRR-RLK45	-	-	-	-	-	-	-	BrLRR-RLK281	-
-	-	BrLRR-RLK75	-	-	-	-	-	-	BrLRR-RLK282	-
-	-	BrLRR-RLK96	-	-	-	-	-	-	BrLRR-RLK283	-
-	BrLRR-RLK44	-	-	BrLRR-RLK151	-	-	-	-	BrLRR-RLK284	-
-	-	BrLRR-RLK74	-	-	-	-	-	-	BrLRR-RLK285	-
-	-	BrLRR-RLK73	-	-	-	-	-	-	BrLRR-RLK286	-
-	-	BrLRR-RLK72	-	-	-	-	-	-	BrLRR-RLK287	-
-	-	-	-	-	-	-	-	-	BrLRR-RLK288	-
-	-	BrLRR-RLK71	-	-	-	-	-	-	BrLRR-RLK289	-
-	-	-	-	-	-	-	-	-	BrLRR-RLK290	-
-	-	-	-	-	-	-	-	-	BrLRR-RLK291	-
-	-	-	-	-	-	-	-	-	BrLRR-RLK292	-
-	-	-	-	-	-	-	-	-	BrLRR-RLK293	-
-	-	BrLRR-RLK95	BrLRR-RLK109 BrLRR-RLK110	-	-	-	-	-	-	BrLRR-RLK294
-	-	-	-	-	-	-	-	-	-	BrLRR-RLK295
-	-	-	-	-	-	-	-	-	-	BrLRR-RLK296
-	-	-	-	-	BrLRR-RLK188	-	BrLRR-RLK224 BrLRR-RLK225	-	-	BrLRR-RLK297
BrLRR-RLK33	-	-	-	-	-	-	-	-	-	BrLRR-RLK298
-	-	-	-	BrLRR-RLK150	-	-	-	-	-	BrLRR-RLK299
BrLRR-RLK4	-	-	-	-	-	-	-	-	-	BrLRR-RLK300
-	-	-	-	-	BrLRR-RLK187	-	-	-	-	BrLRR-RLK301
-	-	-	-	-	-	-	-	-	-	BrLRR-RLK302
-	-	-	-	-	-	-	-	-	-	BrLRR-RLK303

## Sheet: B) TD and SD
Tandem and Segmental duplications of B. rapa LRR-RLK genes
Tandem duplicates	Segmental duplicates
BrLRR-RLK46, BrLRR-RLK47, BrLRR-RLK48	BrLRR-RLK90, BrLRR-RLK91
BrLRR-RLK49, BrLRR-RLK50	BrLRR-RLK114, BrLRR-RLK115
BrLRR-RLK54, BrLRR-RLK55, BrLRR-RLK56	BrLRR-RLK117, BrLRR-RLK118
BrLRR-RLK69, BrLRR-RLK70	BrLRR-RLK145, BrLRR-RLK146
BrLRR-RLK90, BrLRR-RLK91	BrLRR-RLK249, BrLRR-RLK250
BrLRR-RLK114, BrLRR-RLK115	BrLRR-RLK256, BrLRR-RLK257
BrLRR-RLK117, BrLRR-RLK118
BrLRR-RLK128, BrLRR-RLK129
BrLRR-RLK134, BrLRR-RLK135
BrLRR-RLK137, BrLRR-RLK138
BrLRR-RLK146, BrLRR-RLK147
BrLRR-RLK164, BrLRR-RLK165
BrLRR-RLK195, BrLRR-RLK196, BrLRR-RLK197
BrLRR-RLK249, BrLRR-RLK250
BrLRR-RLK256, BrLRR-RLK257
BrLRR-RLK302, BrLRR-RLK303
